# Supplementary material
Source: HighWire-hosted journal article supplement (https://bmjopen.bmj.com/content/15/4/e097515)
Supplement: inline-supplementary-material-1 [file inline-supplementary-material-1.pdf]

SUPPLEMENTARY MATERIAL

**Supplementary Table 1S.** Principles of the ‘*Reference Case for Estimating the Costs of Global Health Services and Interventions*’ proposed by the Global Health Cost Consortium.

| Topic        | Principles                                                                                      | Description                                                                                                                                                                                                                               |
|--------------|-------------------------------------------------------------------------------------------------|-------------------------------------------------------------------------------------------------------------------------------------------------------------------------------------------------------------------------------------------|
| Study design | The purpose of the study, population, and intervention and/or service should be clearly defined | To estimate the cost of three critical healthcare-associated infections (HAIs) in adults, paediatric, and neonatal ICU participating of a nationwide prevention project in Brazil using an improvement science model.                     |
|              | The perspective of the cost estimation should be stated and justified relevant to purpose.      | Public Brazilian Healthcare system perspective. All participants intensive care units (ICUs) were part of the Unified Health System ( <i>sistema único de saúde</i> or <i>SUS</i> ), using financial indicators based on SUS information. |
|              | The type of cost estimated should be defined and justified relevant to purpose                  | We estimated the micro-cost following the local guidelines recommended by the Brazilian Ministry of Health.                                                                                                                               |

|                                 |                                                                                                                                        |                                                                                                                                                                                         |
|---------------------------------|----------------------------------------------------------------------------------------------------------------------------------------|-----------------------------------------------------------------------------------------------------------------------------------------------------------------------------------------|
|                                 | <p>The ‘units’ in the unit costs should be defined, relevant for the costing purpose, and generalizable.</p>                           | <p>Cost per each analyses HAI: central line-associated bloodstream infections, ventilator-associated pneumonia, and catheter-associated urinary tract infections.</p>                   |
|                                 | <p>The time horizon should be of sufficient length to capture all costs relevant for purpose</p>                                       | <p>The time-horizon was established by the project duration (September 2021 to December 2023).</p>                                                                                      |
| <b>Resource use measurement</b> | <p>The scope of the inputs to include in the cost estimation should be defined and justified</p>                                       | <p>We considered the direct costs, including both fixed and variable costs, involved in providing care and assistance during the hospitalisation of patients with the analyzed HAI.</p> |
|                                 | <p>The methods for estimating inputs should be stated, including data sources and criteria used for the allocation of shared costs</p> | <p>We used the absorption model ('top-down') as appropriated.</p>                                                                                                                       |
|                                 | <p>The sampling strategy should be determined by the precision demanded by the costing purpose</p>                                     | <p>The participating ICU were selected by non-randomized sample based on the Ministry of Health priorities, including</p>                                                               |

|                       |                                                                                                                                                                                    |                                                                                                                                                                                                                             |
|-----------------------|------------------------------------------------------------------------------------------------------------------------------------------------------------------------------------|-----------------------------------------------------------------------------------------------------------------------------------------------------------------------------------------------------------------------------|
|                       | and designed to minimize bias                                                                                                                                                      | institutions representing the five Brazilian macroregions.                                                                                                                                                                  |
|                       | The selection of the data source for estimating service use should be described, with potential biases reported in the study limitations                                           | The analysed HAI were diagnosis using the national (Anvisa) and international recommendations (CDC). Data was extracted from the electronic system databases from each participating institution. Limitations are reported. |
|                       | Consideration should be given to the timing of data collection                                                                                                                     | The temporal framework for this evaluation was anchored to the quality improvement initiative duration, spanning from September 2021 to December 2023.                                                                      |
| Pricing and valuation | The sources for price data should be listed by input, and clear delineation should be made between local and international price data sources, and tradable and non-tradable goods | Expenditure records and purchase orders using the local price data resources based on the SUS information (Brazilian Ministry of Health)                                                                                    |
|                       | Capital costs should be appropriately amortized or depreciated to reflect the expected life of capital inputs                                                                      | Not applicable (time horizon less than five years)                                                                                                                                                                          |

|                                                     |                                                                                                                                                                                                                                                                                       |
|-----------------------------------------------------|---------------------------------------------------------------------------------------------------------------------------------------------------------------------------------------------------------------------------------------------------------------------------------------|
|                                                     | <p>Where relevant an appropriate discount rate, Costs are presented in Brazilian currency (Real – BRL\$) inflation and currency conversion rates should be but also presented in international dollars (Intl\$) using the used, and clearly stated last corresponding year: 2023.</p> |
|                                                     | <p>The use and source of shadow prices, for goods and for the opportunity cost of time, should be No adjustments reported.</p>                                                                                                                                                        |
| <b>Analyzing<br/>and<br/>presenting<br/>results</b> | <p>Cost estimates should be communicated clearly and transparently to enable decision-maker(s) to No conflict of interest.<br/>interpret and use the results</p>                                                                                                                      |
|                                                     | <p>The cost of the intervention for sub-populations and other areas of heterogeneity should be explored The following subgroups analyzed costs: (1) macroregions (2) type of ICU (adult, paediatric, and neonatal).</p>                                                               |
|                                                     | <p>The uncertainty associated with cost estimates 95% confidence interval were reported. Univariate should be appropriately characterized. sensitivity analysis was also performed for main cost</p>                                                                                  |

|              |                                                                                                            |
|--------------|------------------------------------------------------------------------------------------------------------|
|              | parameters involved.                                                                                       |
| Transparency | All used methods are communicated clearly and transparently following an open and free national guideline. |
